# Supplementary material for: Quantifying Fundus Autofluorescence in Patients With Retinitis Pigmentosa
Source: PubMed Central journal article supplement (PMC5377994; doi:10.1167/iovs.16-21302), 2017-03
Supplement: iovs-58-03-38_s01.pdf [file iovs-58-03-38_s01.pdf]

Table S1. Region of interest-quantitative fundus autofluorescence (ROI-qAF): Within the autofluorescent ring and just exterior to the ring.

| <b>Temporal</b> | <i>within</i> |       |       |       | <i>exterior</i> |       |       |       |       |            |
|-----------------|---------------|-------|-------|-------|-----------------|-------|-------|-------|-------|------------|
|                 | RP            | mean  | U 95% | L 95% | Outside CL      | RP    | mean  | U 95% | L 95% | Outside CL |
| 1 OD            | 317.3         | 130.8 | 216.2 | 79.1  | *               | 268.9 | 137.7 | 227.5 | 83.3  | *          |
| 1 OS            | 233.0         | 121.4 | 200.6 | 73.5  | *               | 206.0 | 127.6 | 210.9 | 77.2  |            |
| 2 OD            | 199.0         | 130.8 | 183.2 | 93.5  | *               | 204.5 | 135.8 | 190.0 | 97.0  | *          |
| 2 OS            | 231.0         | 131.4 | 184.0 | 93.9  | *               | 238.5 | 135.0 | 188.9 | 96.4  | *          |
| 3 OD            | 212.5         | 147.3 | 206.2 | 105.2 | *               | 198.4 | 154.3 | 216.0 | 110.2 |            |
| 4 OD            | 217.1         | 205.1 | 287.1 | 146.5 |                 | 188.3 | 211.6 | 296.2 | 151.2 |            |
| 5 OD            | 194.4         | 192.3 | 269.2 | 137.4 |                 | 174.9 | 207.6 | 290.7 | 148.3 |            |
| 5 OS            | 235.2         | 192.7 | 269.7 | 137.6 |                 | 215.1 | 207.0 | 289.8 | 147.9 |            |
| 6 OD            | 356.0         | 191.7 | 316.8 | 116.0 | *               | 347.2 | 196.5 | 324.7 | 118.9 | *          |
| 6 OS            | 317.9         | 193.6 | 319.9 | 117.1 |                 | 300.6 | 196.7 | 325.0 | 119.0 |            |
| 7 OD            | 279.7         | 199.1 | 343.1 | 115.5 |                 | 270.2 | 208.4 | 359.1 | 120.9 |            |
| 7 OS            | 271.6         | 198.7 | 342.4 | 115.3 |                 | 248.2 | 206.2 | 355.4 | 119.7 |            |
| 8 OD            | 293.6         | 185.7 | 320.1 | 107.8 |                 | 281.2 | 193.0 | 332.7 | 112.0 |            |
| 8 OS            | 326.7         | 183.8 | 316.6 | 106.6 | *               | 301.2 | 188.5 | 324.8 | 109.4 |            |
| 9 OD            | 205.0         | 218.6 | 376.7 | 126.9 |                 | 169.0 | 232.4 | 400.5 | 134.9 |            |
| 9 OS            | 260.9         | 219.9 | 378.9 | 127.6 |                 | 232.5 | 229.4 | 395.3 | 133.1 |            |
| 10 OD           | 205.0         | 218.6 | 306.0 | 156.2 |                 | 192.5 | 238.2 | 333.5 | 170.2 |            |
| 10 OS           | 228.7         | 222.9 | 312.0 | 159.2 |                 | 230.6 | 242.6 | 339.6 | 173.3 |            |
| 11 OD           | 260.5         | 249.4 | 349.1 | 178.2 |                 | 244.5 | 268.0 | 375.1 | 191.5 |            |
| 11 OS           | 334.3         | 255.7 | 358.0 | 182.7 |                 | 290.0 | 274.3 | 384.0 | 195.9 |            |
| 12 OD           | 361.9         | 234.3 | 387.2 | 141.8 |                 | 385.0 | 243.3 | 402.1 | 147.2 |            |
| 12 OS           | 327.5         | 233.5 | 385.8 | 141.3 |                 | 321.5 | 244.5 | 404.0 | 147.9 |            |
| 13 OD           | 568.1         | 388.2 | 543.3 | 277.3 | *               | 565.1 | 413.0 | 578.2 | 295.1 |            |
| 14 OD           | 413.5         | 469.8 | 657.6 | 335.6 |                 | 334.9 | 510.2 | 714.2 | 364.5 | †          |
| 14 OS           | 383.9         | 465.9 | 652.1 | 332.8 |                 | 335.0 | 492.3 | 689.1 | 351.7 | †          |
| 15 OS           | 566.3         | 512.2 | 717.0 | 365.9 |                 | 485.5 | 537.4 | 752.3 | 383.9 |            |
| <b>Superior</b> | RP            | mean  | U 95% | L 95% | Outside CL      | RP    | mean  | U 95% | L 95% | Outside CL |
| 1 OD            | 345.5         | 114.9 | 190.0 | 69.6  | *               | 324.6 | 118.1 | 195.2 | 71.5  | *          |
| 1 OS            | 310.5         | 112.4 | 185.7 | 68.0  | *               | 300.5 | 122.5 | 202.5 | 74.1  | *          |
| 2 OD            | 162.0         | 110.1 | 154.1 | 78.7  | *               | 164.5 | 114.6 | 160.4 | 81.8  | *          |
| 2 OS            | 165.5         | 113.0 | 158.2 | 80.7  | *               | 181.5 | 117.4 | 164.3 | 83.9  | *          |
| 3 OD            | 225.0         | 140.3 | 196.3 | 100.2 | *               | 206.0 | 154.3 | 216.0 | 110.2 |            |
| 4 OD            | 186.0         | 216.5 | 303.1 | 154.7 |                 | 160.0 | 241.2 | 337.6 | 172.3 | †          |
| 5 OD            | 213.5         | 202.8 | 283.8 | 144.9 |                 | 207.6 | 216.3 | 302.8 | 154.5 |            |
| 5 OS            | 196.0         | 199.3 | 279.0 | 142.4 |                 | 186.0 | 213.8 | 299.3 | 152.7 |            |
| 6 OD            | 320.5         | 172.2 | 284.5 | 104.2 | *               | 344.2 | 178.2 | 294.4 | 107.8 | *          |
| 6 OS            | 275.9         | 169.6 | 280.2 | 102.6 |                 | 284.7 | 179.6 | 296.8 | 108.7 |            |

|       |       |       |       |       |   |       |       |       |       |   |
|-------|-------|-------|-------|-------|---|-------|-------|-------|-------|---|
| 7 OD  | 214.8 | 181.8 | 313.3 | 105.5 |   | 234.4 | 193.9 | 334.2 | 112.6 |   |
| 7 OS  | 224.9 | 182.0 | 313.5 | 105.6 |   | 237.4 | 193.8 | 333.9 | 112.5 |   |
| 8 OD  | 213.8 | 155.4 | 267.8 | 90.2  |   | 208.0 | 161.4 | 278.1 | 93.6  |   |
| 8 OS  | 212.2 | 155.1 | 267.3 | 90.0  |   | 225.9 | 163.4 | 281.6 | 94.8  |   |
| 9 OD  | 215.5 | 189.8 | 327.1 | 110.2 |   | 192.9 | 200.0 | 344.6 | 116.1 |   |
| 9 OS  | 193.5 | 185.6 | 319.9 | 107.7 |   | 162.5 | 197.3 | 340.0 | 114.5 |   |
| 10 OD | 234.5 | 207.3 | 290.1 | 148.1 |   | 209.0 | 230.9 | 323.2 | 164.9 |   |
| 10 OS | 214.9 | 221.7 | 310.4 | 158.4 |   | 184.6 | 251.0 | 351.4 | 179.3 |   |
| 11 OD | 244.0 | 237.6 | 332.5 | 169.7 |   | 233.5 | 265.1 | 371.1 | 189.4 |   |
| 11 OS | 246.9 | 237.6 | 332.5 | 169.7 |   | 274.1 | 258.5 | 361.9 | 184.7 |   |
| 12 OD | 382.5 | 204.5 | 338.0 | 123.8 | * | 377.0 | 223.4 | 369.2 | 135.2 | * |
| 12 OS | 313.5 | 207.0 | 342.0 | 125.2 |   | 316.0 | 220.0 | 363.6 | 133.1 |   |
| 13 OD | 496.6 | 329.0 | 460.5 | 235.0 | * | 503.5 | 346.6 | 485.2 | 247.6 | * |
| 14 OD | 419.4 | 402.4 | 563.2 | 287.4 |   | 372.5 | 434.7 | 608.5 | 310.6 |   |
| 14 OS | 469.5 | 419.4 | 587.0 | 299.6 |   | 468.5 | 458.0 | 641.1 | 327.2 |   |
| 15 OS | 454.0 | 498.2 | 697.4 | 355.9 |   | 457.0 | 539.3 | 754.9 | 385.2 |   |

**Inferior**

|       | RP    | mean  | U 95% | L 95% | Outside CL | RP    | mean  | U 95% | L 95% | Outside CL |
|-------|-------|-------|-------|-------|------------|-------|-------|-------|-------|------------|
| 1 OD  | 273.7 | 109.7 | 181.2 | 66.4  | *          | 263.7 | 116.9 | 193.2 | 70.7  | *          |
| 1 OS  | 196.0 | 109.6 | 181.1 | 66.3  | *          | 197.5 | 117.0 | 193.3 | 70.8  | *          |
| 2 OD  | 193.0 | 109.6 | 153.4 | 78.3  | *          | 206.5 | 114.3 | 160.1 | 81.7  | *          |
| 2 OS  | 200.5 | 108.0 | 151.1 | 77.1  | *          | 215.4 | 114.4 | 160.2 | 81.8  | *          |
| 3 OD  | 179.9 | 129.1 | 180.7 | 92.2  |            | 159.6 | 137.3 | 192.2 | 98.1  |            |
| 4 OD  | 173.5 | 156.0 | 218.4 | 111.4 |            | 150.7 | 167.1 | 234.0 | 119.4 |            |
| 5 OD  | 158.7 | 163.5 | 228.9 | 116.8 |            | 135.2 | 175.5 | 245.7 | 125.4 |            |
| 5 OS  | 159.2 | 158.1 | 221.3 | 112.9 |            | 143.9 | 167.3 | 234.2 | 119.5 |            |
| 6 OD  | 255.7 | 162.5 | 268.5 | 98.3  |            | 244.2 | 167.1 | 276.2 | 101.1 |            |
| 6 OS  | 235.0 | 162.6 | 268.7 | 98.4  |            | 210.3 | 170.6 | 281.9 | 103.2 |            |
| 7 OD  | 240.0 | 164.5 | 283.4 | 95.4  |            | 247.0 | 175.0 | 301.5 | 101.5 |            |
| 7 OS  | 199.0 | 164.5 | 283.4 | 95.4  |            | 212.2 | 176.2 | 303.6 | 102.3 |            |
| 8 OD  | 223.8 | 153.8 | 265.0 | 89.3  |            | 232.0 | 162.2 | 279.5 | 94.1  |            |
| 8 OS  | 242.9 | 153.9 | 265.3 | 89.3  |            | 255.4 | 162.6 | 280.2 | 94.4  |            |
| 9 OD  | 163.0 | 177.1 | 305.1 | 102.8 |            | 127.5 | 190.4 | 328.1 | 110.5 |            |
| 9 OS  | 170.9 | 176.0 | 303.3 | 102.1 |            | 121.3 | 186.9 | 322.1 | 108.5 |            |
| 10 OD | 218.0 | 196.6 | 275.2 | 140.5 |            | 197.9 | 214.1 | 299.6 | 152.9 |            |
| 10 OS | 185.0 | 195.8 | 274.0 | 139.8 |            | 161.0 | 217.3 | 304.2 | 155.2 |            |
| 11 OD | 159.8 | 206.4 | 288.9 | 147.4 |            | 195.9 | 218.8 | 306.3 | 156.3 |            |
| 11 OS | 219.8 | 201.9 | 282.6 | 144.2 |            | 217.6 | 215.2 | 301.2 | 153.7 |            |
| 12 OD | 337.0 | 192.7 | 318.4 | 116.6 | *          | 327.0 | 205.0 | 338.8 | 124.0 |            |
| 12 OS | 310.0 | 196.3 | 324.4 | 118.8 |            | 314.4 | 211.4 | 349.4 | 127.9 |            |
| 13 OD | 436.2 | 290.8 | 407.0 | 207.7 | *          | 467.1 | 307.2 | 430.0 | 219.4 | *          |
| 14 OD | 342.9 | 349.8 | 489.7 | 249.9 |            | 291.5 | 387.7 | 542.6 | 276.9 |            |
| 14 OS | 282.0 | 342.8 | 479.8 | 244.9 |            | 250.5 | 377.8 | 528.9 | 269.9 | †          |

15 OS

|       |       |       |       |       |       |       |       |
|-------|-------|-------|-------|-------|-------|-------|-------|
| 423.0 | 379.3 | 530.9 | 270.9 | 373.5 | 410.0 | 573.9 | 292.9 |
|-------|-------|-------|-------|-------|-------|-------|-------|

---

RP, average ROI-qAF values for patients with retinitis pigmentosa; mean, average predicted ROI-qAF values for healthy eyes; U 95%, average predicted upper 95% confidence interval for healthy eyes; L 95%, average predicted lower 95% confidence interval for healthy eyes. CL, confidence limits. Predicted ROI-qAF values for healthy eyes were adjusted for age, race/ethnicity and eccentricity. \* higher than the U 95%; † lower than L 95%.
