# Supplementary material for: Quantifying Fundus Autofluorescence in Patients With Retinitis Pigmentosa
Source: PubMed Central journal article supplement (PMC5377994; doi:10.1167/iovs.16-21302), 2017-03
Supplement: iovs-58-03-38_s02.pdf [file iovs-58-03-38_s02.pdf]

**Supplementary Figure S1**

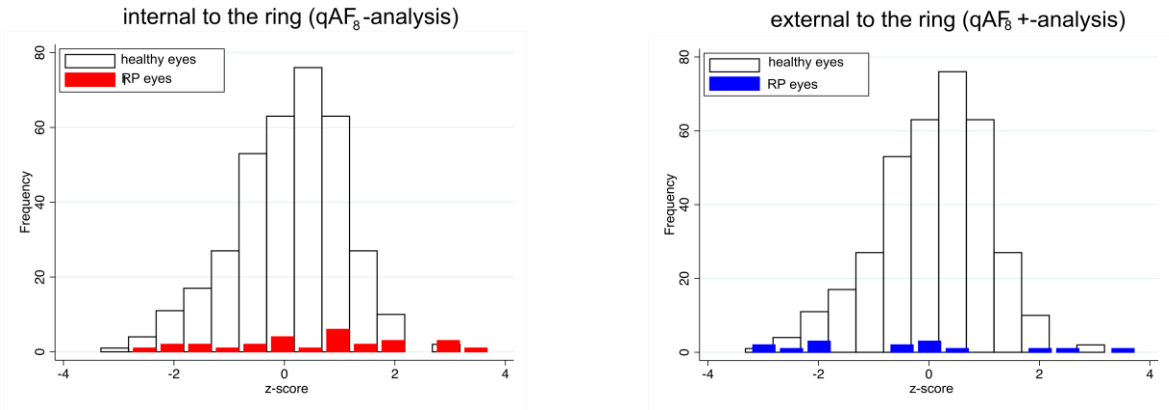

**Supplementary Figure S1.** z-score distribution in qAF<sub>8</sub> analysis in SW-AF images. Internal to the ring represents the z-score distribution of qAF<sub>8</sub> values of healthy and RP eyes internal to the inner border of the ring (measurements taken in patients with peripheral and crescent shaped rings) and external to the ring (acquired in patients with small rings).
